# Supplementary material for: Designing better input support programs: Lessons from zinc subsidies in Andhra Pradesh, India
Source: PLOS journal article supplement (doi:10.1371/journal.pone.0242161), 2020-12-03
Supplement: S1 (10.1371/journal.pone.0242161.s001) [file journal.pone.0242161.s001]

**S1 Table. Description of variables used in the study**

| Variable                        | Description                                                                    |
|---------------------------------|--------------------------------------------------------------------------------|
| <i>Zinc Deficiency Identify</i> | Dummy variable=1 if one can identify zinc deficiency in his/her land and 0 o/w |
| <i>Land owned</i>               | Land owned in crop year 2018 in acres                                          |
| <i>Land ownedsq</i>             | Square of land owned above                                                     |
| <i>Tenant</i>                   | Dummy variable=1 if one was a tenant farmer in year 2018 and 0 o/w             |
| <i>Marginal farmer</i>          | Dummy variable=1 if $(0.02 < \text{land owned} \leq 1 \text{ ha})$ and 0 o/w   |
| <i>Small farmer</i>             | Dummy variable=1 if $(1 < \text{land owned} \leq 2 \text{ ha})$ and 0 o/w      |
| <i>Semi-medium farmer</i>       | Dummy variable=1 if $(2 < \text{land owned} \leq 4 \text{ ha})$ and 0 o/w      |
| <i>Medium farmer</i>            | Dummy variable=1 if $(4 < \text{land owned} \leq 10 \text{ ha})$ and 0 o/w     |
| <i>Scheduled Caste</i>          | Dummy variable=1 if one is Scheduled Caste and 0 o/w                           |
| <i>Scheduled Tribe</i>          | Dummy variable=1 if one is Scheduled Tribe and 0 o/w                           |
| <i>Other Backward Classes</i>   | Dummy variable=1 if one is from Other Backward Classes and 0 o/w               |
| <i>Educated</i>                 | Dummy variable=1 if one has some formal education and 0 o/w                    |
| <i>Used Zinc</i>                | Dummy variable=1 if used zinc in 2018 and 0 o/w                                |
| <i>Used Boron</i>               | Dummy variable=1 if used boron in 2018 and 0 o/w                               |
| <i>Used Gypsum</i>              | Dummy variable=1 if used gypsum in 2018 and 0 o/w                              |
| <i>Free Zinc</i>                | Dummy variable=1 if used free zinc in 2018 and 0 if not used zinc at all       |
| <i>Purchased Zinc</i>           | Dummy variable=1 if used purchased zinc in 2018 and 0 if not used zinc at all  |

|                                           |                                                                                |
|-------------------------------------------|--------------------------------------------------------------------------------|
| <i>Cultivated Paddy</i>                   | Dummy variable=1 if one cultivated paddy as their major crop in 2018 and 0 o/w |
| <i>Age</i>                                | Age in years                                                                   |
| <i>Age squared</i>                        | Age in years squared                                                           |
| <i>Farming experience</i>                 | Farming experience in years                                                    |
| <i>Farming experiencesq</i>               | Farming experience in years squared                                            |
| <i>Male</i>                               | Dummy variable=1 if respondent is male and 0 o/w                               |
| <i>Family size</i>                        | Number of family members in the household including self                       |
| <i>Soil health card</i>                   | Dummy variable=1 if one owns a SHC and 0 o/w                                   |
| <i>Knows the MPEO</i>                     | Dummy variable=1 if one knows the MPEO and 0 o/w                               |
| <i>Shop distance</i>                      | Distance from shop in kilometers                                               |
| <i>Irrigation</i>                         | Dummy variable=1 if irrigation was done in 2018 and 0 o/w                      |
| <i>Asset index</i>                        | Index of household asset position                                              |
| <i>District</i>                           | Dummy variable=1 for each district and 0 o/w                                   |
| <i>MPEO</i>                               | Dummy variable=1 for each MPEO and 0 o/w                                       |
| <i>Used only purchased zinc</i>           | Dummy variable=1 if used only purchased zinc in 2018 and 0 o/w                 |
| <i>Used both purchased and free zinc</i>  | Dummy variable=1 if used both free and purchased zinc in 2018 and 0 o/w        |
| <i>Cultivated in only Kharif</i>          | Dummy variable=1 if cultivated only in kharif 2018 and 0 o/w                   |
| <i>Cultivated in both Kharif and Rabi</i> | Dummy variable=1 if cultivated in both kharif 2018 and rabi 2018-19 and 0 o/w  |
| <i>Zinc status of the village (ppm)</i>   | Level of zinc in village in parts per million                                  |
